# Supplementary material
Source: ML conference proceedings conference paper supplement (https://proceedings.neurips.cc/paper_files/paper/2019/hash/fa3a3c407f82377f55c19c5d403335c7-Abstract.html)
Supplement: Supplementary file [file fa3a3c407f82377f55c19c5d403335c7-Supplemental.zip]

---

# Neural Diffusion Distance for Image Segmentation (Supplementary Material)

---

**Jian Sun and Zongben Xu**  
School of Mathematics and Statistics  
Xi'an Jiaotong University, P. R. China  
{jiansun, zbxu}@xjtu.edu.cn

This supplementary material is organized as follows. We first give a brief proof of proposition 1. Then we will present more examples on the learned diffusion distance, image segmentation results, and weakly supervised semantic segmentation results.

## 1 Proof of proposition 1

For the transition matrix  $P$ , assume its spectral decomposition is  $P = \Phi \Lambda \Phi^T$ , then the powered version of  $P$ :  $P^{2t} = \Phi \Lambda^{2t} \Phi^T$ . It is known that, for a matrix  $P$ , the simultaneous iteration has the following conclusion [9, 27].

*By applying simultaneous iteration (Eq.(5)) to matrix  $P$ , assume eigenvalues of  $P$  satisfy  $\lambda_0 > \lambda_1 > \dots > \lambda_{N_e-1} > \lambda_{N_e}$ , and all leading principal sub-matrices of  $\Gamma^T U_0$  ( $\Gamma$  is a matrix with columns as  $\Phi_1, \dots, \Phi_{N_e}$ ) are non-singular, then columns of  $U_n$  converge to leading  $N_e$  eigenvectors in linear rate of  $(\max_{k \in [1, N_e]} \{|\lambda_k|/|\lambda_{k-1}|\})$ , and diagonal values of  $R_n$  converge to corresponding top  $N_e$  eigenvalues  $\lambda_0, \dots, \lambda_{N_e-1}$  in the same rate.*

$P^{2t}$  has the same eigenvectors as  $P$ , but has eigenvalues  $\lambda_0^{2t}, \dots, \lambda_N^{2t}$  as powered version of eigenvalues of  $P$ . Therefore, by applying simultaneous iteration to  $P^{2t}$  instead of  $P$ , it can be concluded that the accelerated simultaneous iteration satisfies the proposition 1 in the submitted paper.

## 2 More examples and results

**Figure 1:** examples of learned diffusion similarity maps for images in BSD500 test set using trained spec-diff-net on BSD500 train+val sets.

**Figure 2:** examples of hierarchical segmentation results for images in BSD500 test set using proposed hierarchical segmentation algorithm and trained spec-diff-net on BSD500 train+val sets.

**Figure 3:** examples for comparing different segmentation methods. Each method can generate a hierarchy of segmentations with different number of segments. Here we only show the segmentation in the hierarchy that best matches the ground-truth segmentation labeled by human.

**Figure 4:** examples to show the pseudo-segmentation probability maps generated by our weakly-supervised semantic segmentation net on VOC 2012 augmented training dataset.

**Figure 5:** examples for comparing weakly-supervised semantic segmentation results on val set of VOC 2012 segmentation dataset.

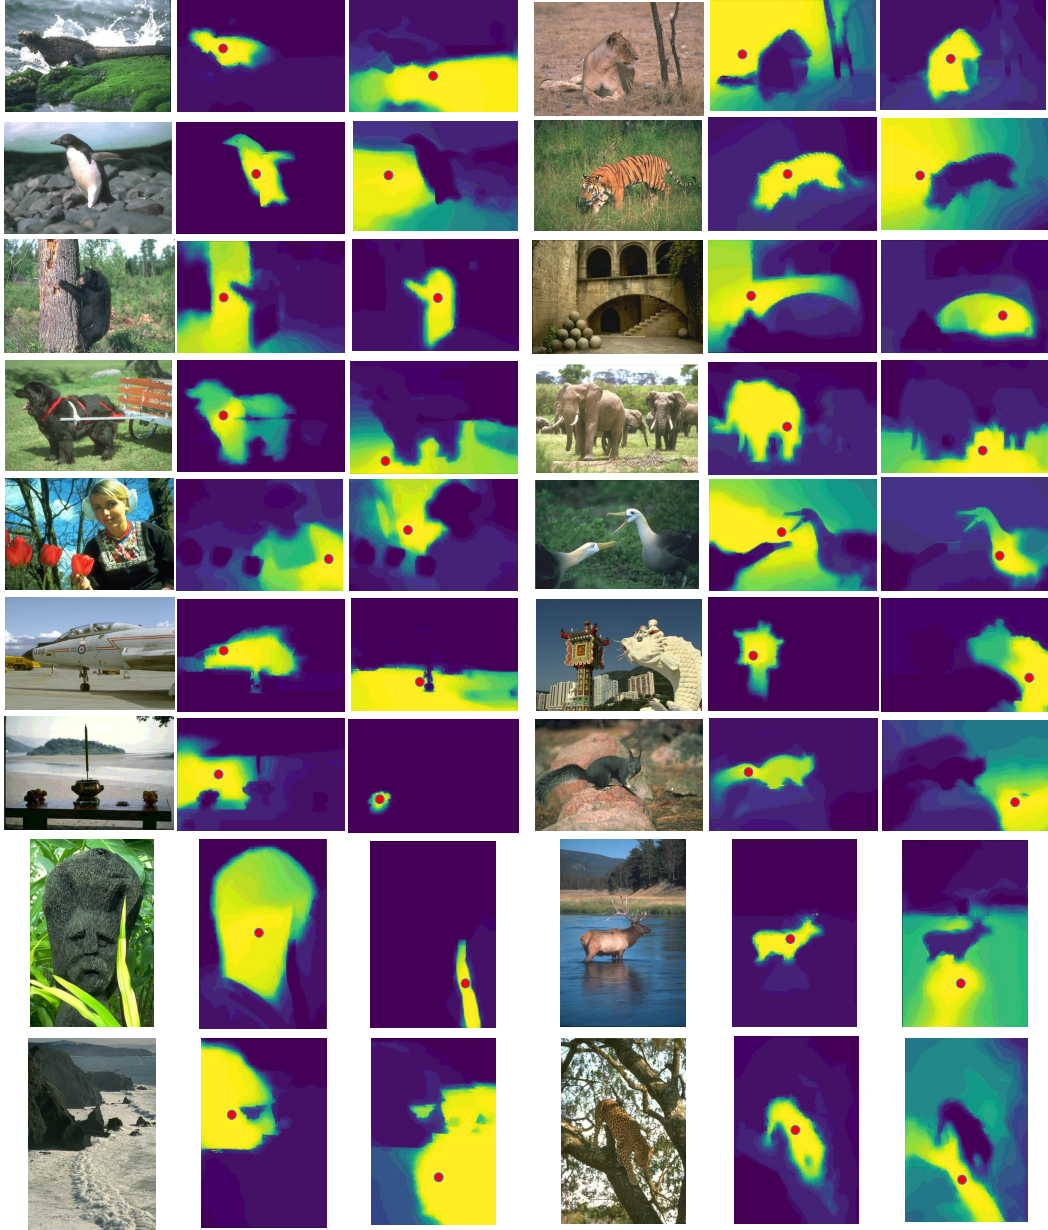

Figure 1: Examples of learned diffusion similarity maps for images in BSD500 test set using trained spec-diff-net on BSD500 train+val sets.

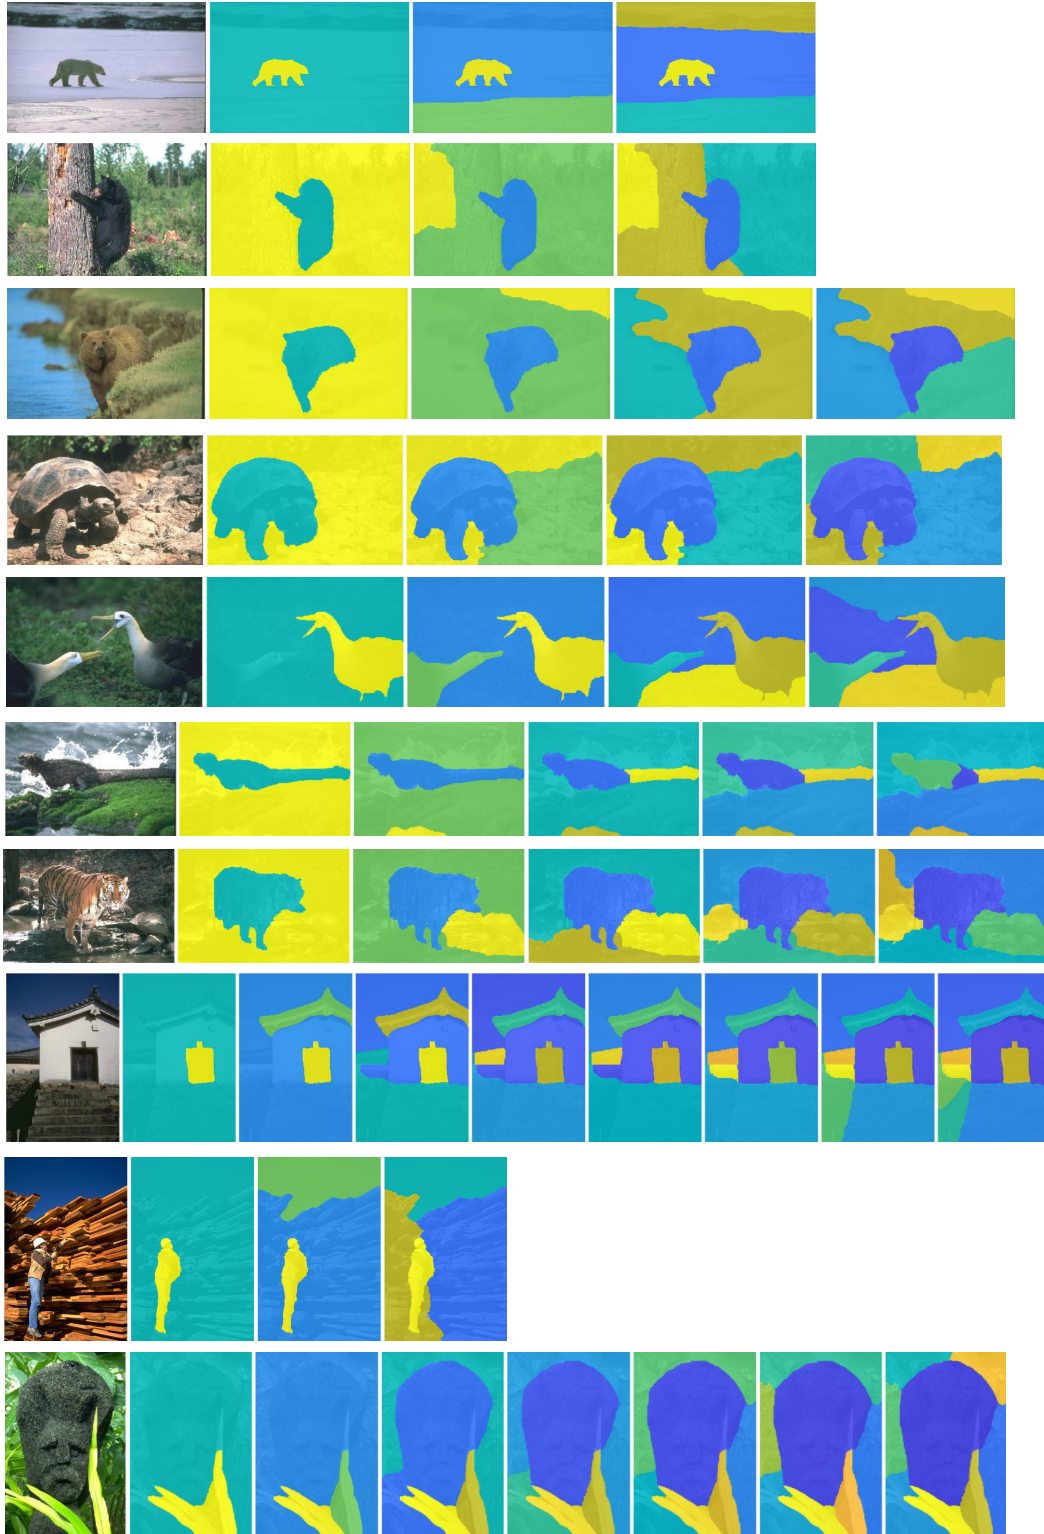

Figure 2: Examples of hierarchical segmentation results for images in BSD500 test set using proposed hierarchical segmentation algorithm and trained spec-diff-net on BSD500 train+val sets. On each row, the second to final sub-images are hierarchical segmentations with increasing number of segments.

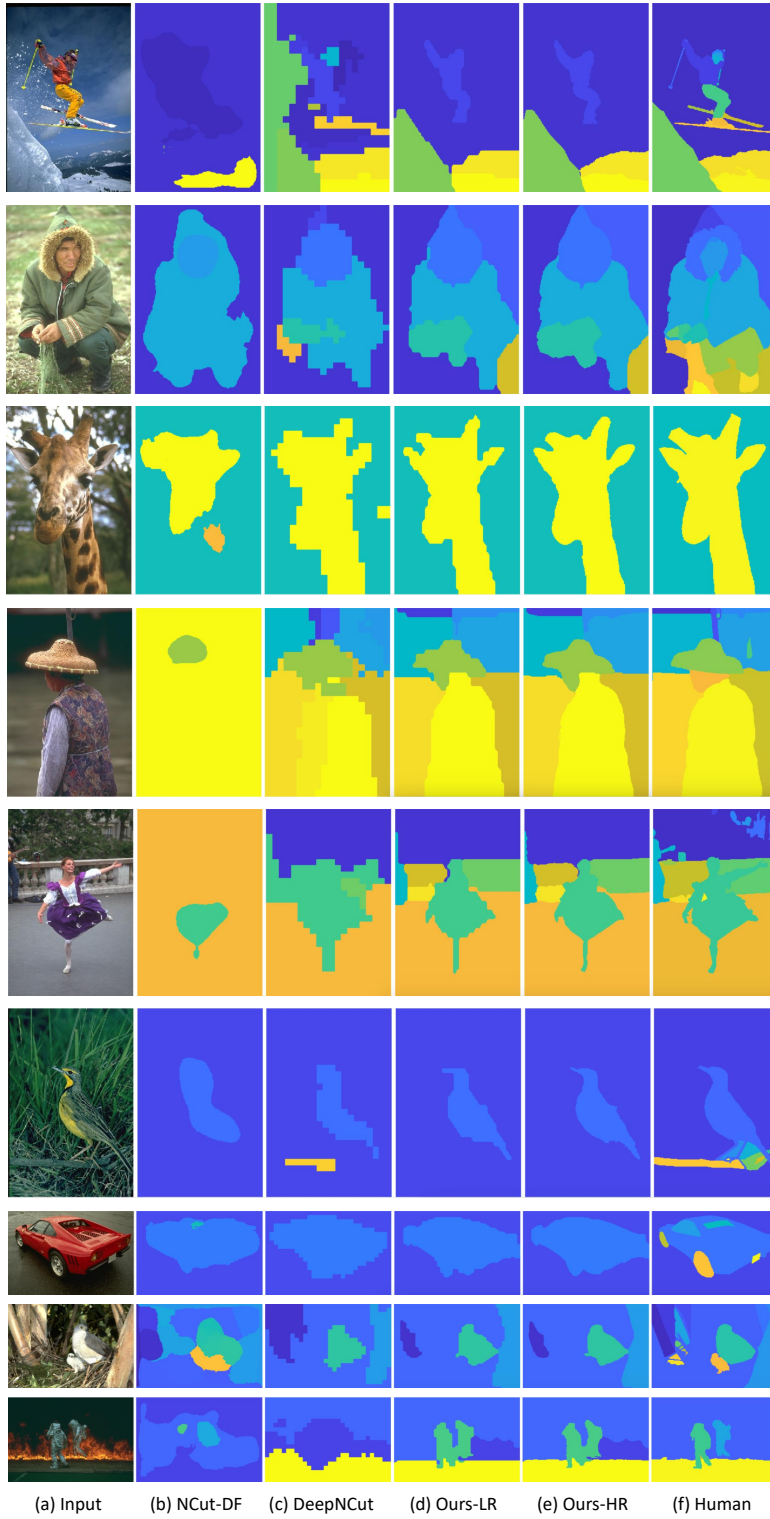

Figure 3: Examples for comparing different segmentation methods (NCut-DF [26], DeepNCut [13], our method w/o (ours-LR) and with (ours-HR) feature-attentional interpolation). Each method can generate a hierarchy of segmentation with different number of segments. Here we only show the segmentation in the hierarchy best matching the ground-truth segmentation labeled by human.



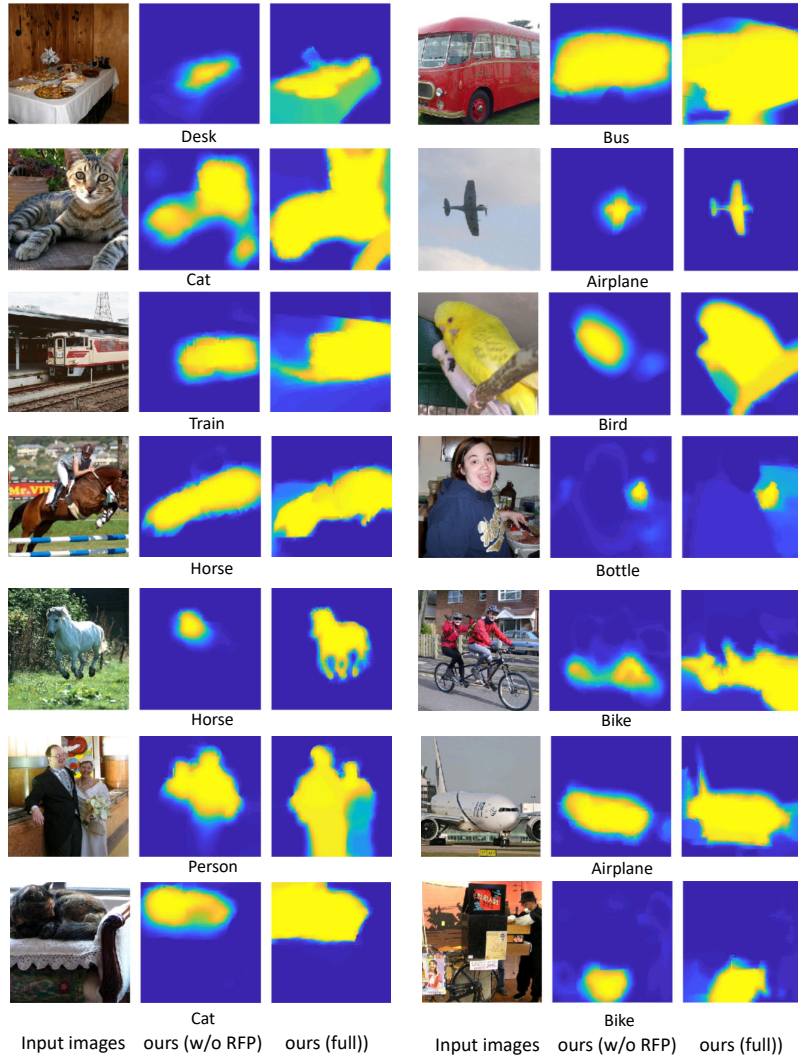

Figure 4: Examples to show the pseudo-segmentation probability maps generated by our weakly-supervised semantic segmentation net on VOC 2012 augmented training dataset.

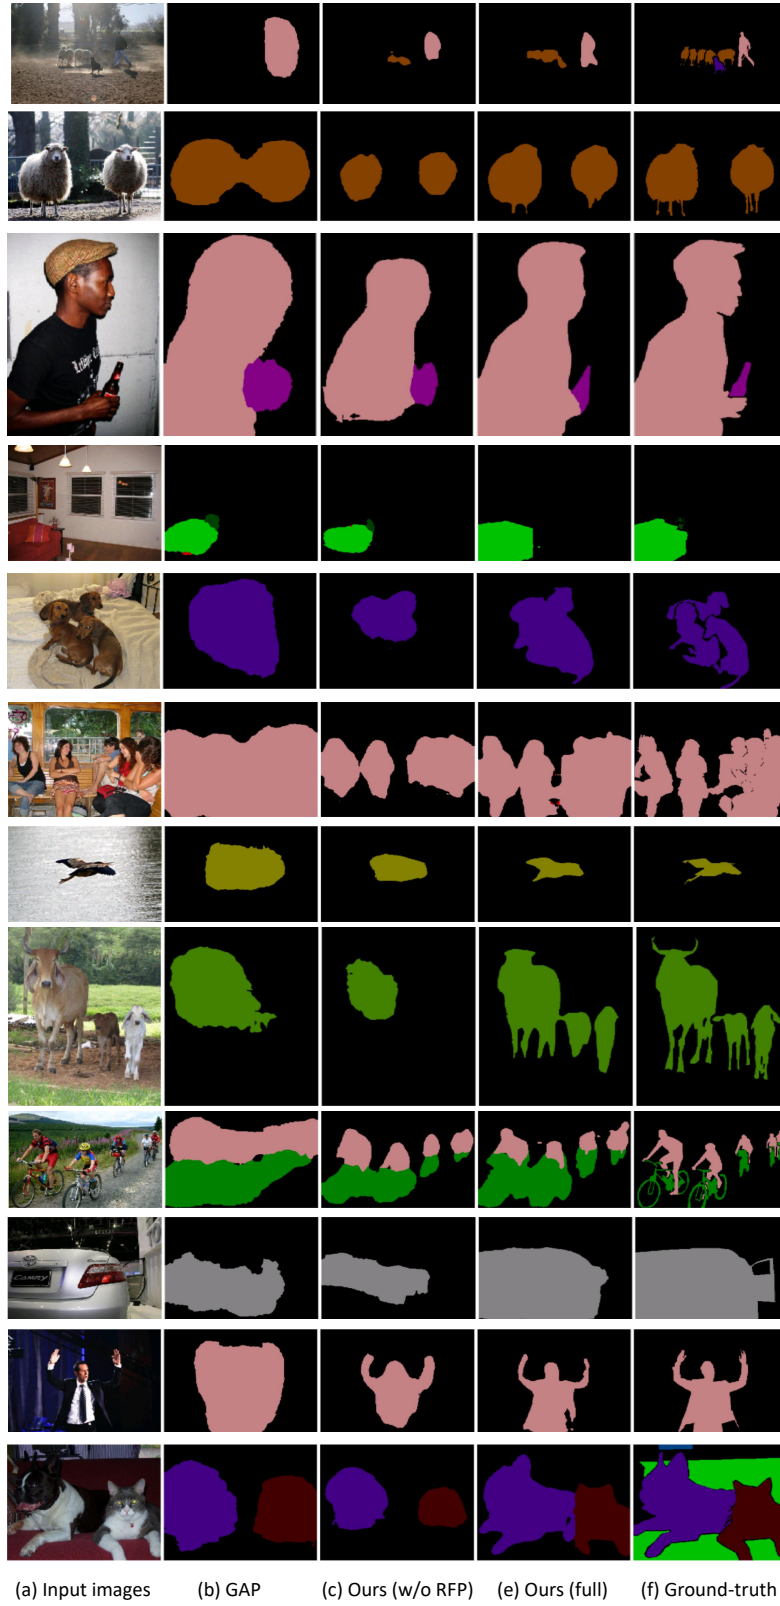

Figure 5: Examples for comparing weakly-supervised semantic segmentation results on val of VOC 2012 segmentation dataset. (RFP: Regional feature pooling).
